# Supplementary material
Source: PubMed Central journal article supplement (PMC1820951)
Supplement: plntcell_tpc.106.045831_3.pdf [file plntcell_tpc.106.045831_3.pdf]

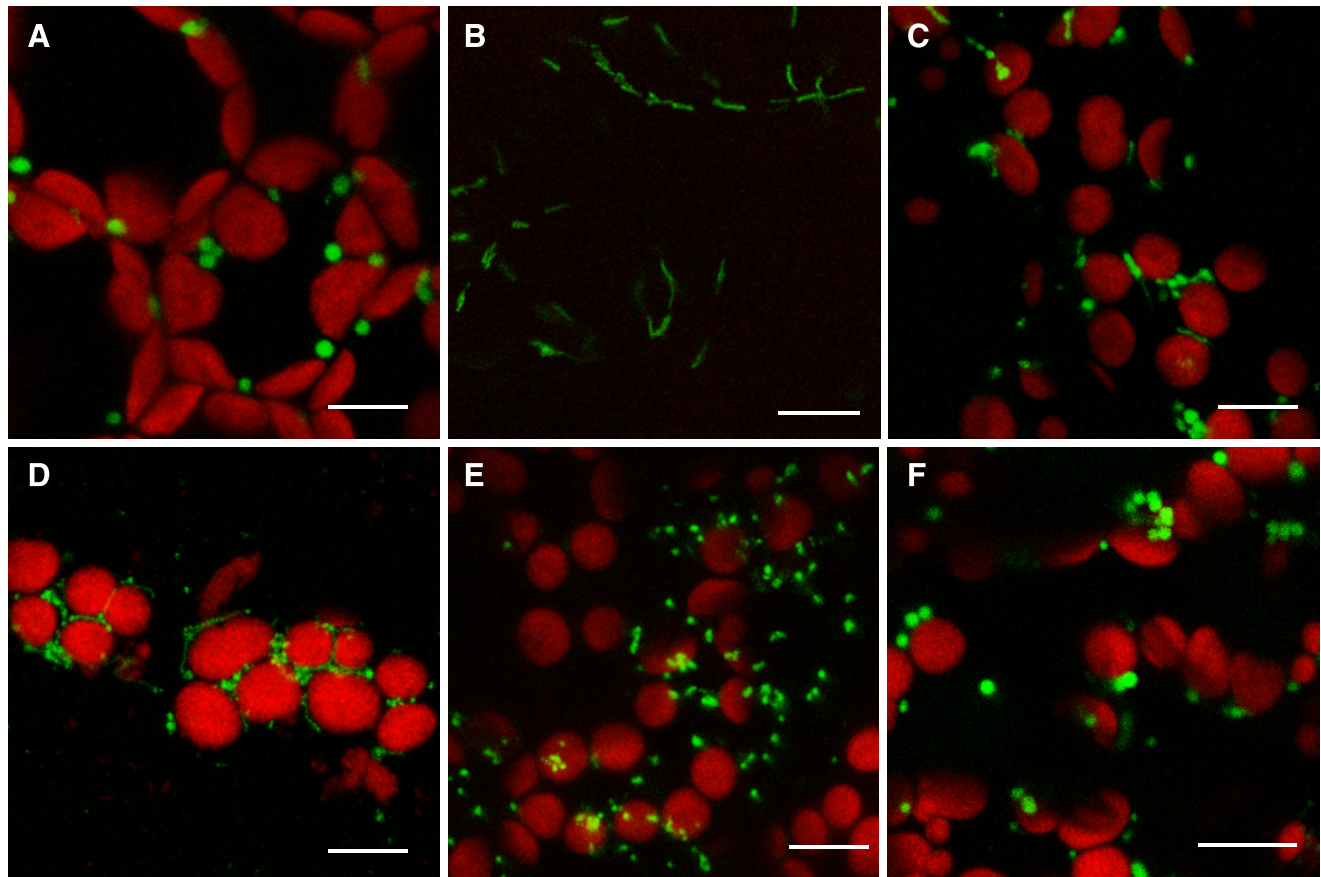

**G**

|            | Col-0 WT   | YFP-PTS1   | <i>pex14</i> | <i>PEX11a</i> | <i>PEX11b</i> | <i>PEX11c</i> | <i>PEX11d</i> | <i>PEX11e</i> |
|------------|------------|------------|--------------|---------------|---------------|---------------|---------------|---------------|
| no sucrose | 12.76±2.64 | 12.88±1.96 | 3.46±1.01    | 18±1.76       | 15.64±2.68    | 15.24±3.28    | 16.46±1.82    | 15.01±3.5     |
| 1% sucrose | 13.12±2.43 | 14.52±2.05 | 11.75±2.05   | 13.68±2.14    | 14.74±1.45    | 13.93±1.52    | 16.09±1.74    | 14.61±1.46    |

**Supplemental Figure 3. Peroxisome phenotype in  $P_{35S}::PEX11$  plants and sugar-dependence assay of  $P_{35S}::CFP-PEX11$  seedlings.**

(A-F) Confocal micrographs of leaf mesophyll cells were taken from 7-week YFP-SKL plants containing  $P_{35S}::PEX11a$  (B),  $P_{35S}::PEX11b$  (C),  $P_{35S}::PEX11c$  (D),  $P_{35S}::PEX11d$  (E), and  $P_{35S}::PEX11e$  (F), as compared with the control YFP-SKL plant (A). Bars = 10  $\mu$ m.

(G) Hypocotyl lengths of 5-d dark-grown seedlings grown on sugar-free or 1% sucrose medium.
